# Supplementary material
Source: publisher figshare collection journal article supplement (https://acs.figshare.com/ndownloader/files/4133398)

# checkCIF/PLATON report

You have not supplied any structure factors. As a result the full set of tests cannot be run.

No syntax errors found.      CIF dictionary      Interpreting this report

## Datablock: sq13\_se\_pb

---

Bond precision:    C-C = 0.0117 Å                      Wavelength=1.54175

Cell:              a=12.9142(5)      b=13.4373(2)              c=6.82870(13)  
                    alpha=90              beta=96.9271(17)          gamma=90

Temperature:      293 K

|                        | Calculated    | Reported      |
|------------------------|---------------|---------------|
| Volume                 | 1176.35(5)    | 1176.35(5)    |
| Space group            | P 21/c        | P 1 21/c 1    |
| Hall group             | -P 2ybc       | -P 2ybc       |
| Moiety formula         | C11 H16 N2 O3 | C22 H32 N4 O6 |
| Sum formula            | C11 H16 N2 O3 | C22 H32 N4 O6 |
| Mr                     | 224.26        | 448.00        |
| Dx, g cm <sup>-3</sup> | 1.266         | 0.000         |
| Z                      | 4             | 2             |
| Mu (mm <sup>-1</sup> ) | 0.768         | 0.000         |
| F000                   | 480.0         | 0.0           |
| F000'                  | 481.55        |               |
| h,k,lmax               | 9,9,5         |               |
| Nref                   | 505           |               |
| Tmin,Tmax              |               |               |
| Tmin'                  |               |               |

Correction method= Not given

Data completeness= 0.000                      Theta(max)=

R(reflections)=                      wR2(reflections)=

S =                      Npar=

---

The following ALERTS were generated. Each ALERT has the format  
**test-name\_ALERT\_alert-type\_alert-level**.  
Click on the hyperlinks for more details of the test.

---

### Alert level A

---

### Alert level B

---

PLAT241\_ALERT\_2\_B Check High

Ueq as Compared to Neighbors for

C4

|                   |                       |                                  |            |
|-------------------|-----------------------|----------------------------------|------------|
| PLAT241_ALERT_2_B | Check High            | Ueq as Compared to Neighbors for | C10        |
| PLAT242_ALERT_2_B | Check Low             | Ueq as Compared to Neighbors for | N3         |
| PLAT242_ALERT_2_B | Check Low             | Ueq as Compared to Neighbors for | N13        |
| PLAT340_ALERT_3_B | Low Bond Precision on | C-C Bonds .....                  | 0.0117 Ang |

### ● Alert level C

REFI015\_ALERT\_1\_A \_refine\_ls\_shift/su\_max is missing  
 Maximum shift/s.u. ratio after final refinement cycle.  
 The following tests will not be performed  
 SHFSU\_01

|                   |            |                                   |           |
|-------------------|------------|-----------------------------------|-----------|
| PLAT241_ALERT_2_C | Check High | Ueq as Compared to Neighbors for  | C15       |
| PLAT242_ALERT_2_C | Check Low  | Ueq as Compared to Neighbors for  | O21       |
| PLAT351_ALERT_3_C | Long       | C-H Bond (0.96A) C1 - H31 ...     | 1.15 Ang. |
| PLAT351_ALERT_3_C | Long       | C-H Bond (0.96A) C1 - H32 ...     | 1.11 Ang. |
| PLAT351_ALERT_3_C | Long       | C-H Bond (0.96A) C7 - H8 ...      | 1.16 Ang. |
| PLAT351_ALERT_3_C | Long       | C-H Bond (0.96A) C7 - H9 ...      | 1.12 Ang. |
| PLAT351_ALERT_3_C | Long       | C-H Bond (0.96A) C22 - H28 ...    | 1.11 Ang. |
| PLAT351_ALERT_3_C | Long       | C-H Bond (0.96A) C24 - H27 ...    | 1.14 Ang. |
| PLAT353_ALERT_3_C | Long       | N-H Bond (0.87A) N13 - H14 ...    | 1.02 Ang. |
| PLAT411_ALERT_2_C | Short      | Inter H...H Contact H30 .. H30 .. | 2.00 Ang. |

### ● Alert level G

|                   |                                                  |            |
|-------------------|--------------------------------------------------|------------|
| PLAT007_ALERT_5_G | Note: Number of Unrefined D-H Atoms .....        | 1          |
| PLAT042_ALERT_1_G | Calc. and Reported MoietyFormula Strings Differ  | ?          |
| PLAT045_ALERT_1_G | Calculated and Reported Z Differ by .....        | 2.00 Ratio |
| PLAT343_ALERT_2_G | Check sp? Angle Range in Main Residue for ..     | C1         |
| PLAT343_ALERT_2_G | Check sp? Angle Range in Main Residue for ..     | C2         |
| PLAT860_ALERT_3_G | Note: Number of Least-Squares Restraints .....   | 87         |
| PLAT950_ALERT_5_G | Reported and Calculated Hmax Values Differ by .. | 9          |
| PLAT951_ALERT_5_G | Reported and Calculated Kmax Values Differ by .. | 9          |
| PLAT952_ALERT_5_G | Reported and Calculated Lmax Values Differ by .. | 5          |
| PLAT982_ALERT_1_G | The C-f' = 0.017 Deviates from the IT-value      | 0.018      |
| PLAT982_ALERT_1_G | The N-f' = 0.029 Deviates from the IT-value      | 0.031      |
| PLAT982_ALERT_1_G | The O-f' = 0.047 Deviates from the IT-value      | 0.049      |
| PLAT983_ALERT_1_G | The C-f" = 0.009 Deviates from the IT-Value      | 0.009      |
| PLAT983_ALERT_1_G | The O-f" = 0.032 Deviates from the IT-Value      | 0.032      |

1 **ALERT level A** = Most likely a serious problem - resolve or explain  
 5 **ALERT level B** = A potentially serious problem, consider carefully  
 10 **ALERT level C** = Check. Ensure it is not caused by an omission or oversight  
 14 **ALERT level G** = General information/check it is not something unexpected

8 ALERT type 1 CIF construction/syntax error, inconsistent or missing data  
 9 ALERT type 2 Indicator that the structure model may be wrong or deficient  
 9 ALERT type 3 Indicator that the structure quality may be low  
 0 ALERT type 4 Improvement, methodology, query or suggestion  
 4 ALERT type 5 Informative message, check

It is advisable to attempt to resolve as many as possible of the alerts in all categories. Often the minor alerts point to easily fixed oversights, errors and omissions in your CIF or refinement strategy, so attention to these fine details can be worthwhile. In order to resolve some of the more serious problems it may be necessary to carry out additional measurements or structure refinements. However, the purpose of your study may justify the reported deviations and the more serious of these should normally be commented upon in the discussion or experimental section of a paper or in the "special\_details" fields of the CIF. checkCIF was carefully designed to identify outliers and unusual parameters, but every test has its limitations and alerts that are not important in a particular case may appear. Conversely, the absence of alerts does not guarantee there are no aspects of the results needing attention. It is up to the individual to critically assess their own results and, if necessary, seek expert advice.

### **Publication of your CIF in IUCr journals**

A basic structural check has been run on your CIF. These basic checks will be run on all CIFs submitted for publication in IUCr journals (*Acta Crystallographica*, *Journal of Applied Crystallography*, *Journal of Synchrotron Radiation*); however, if you intend to submit to *Acta Crystallographica Section C* or *E*, you should make sure that full publication checks are run on the final version of your CIF prior to submission.

### **Publication of your CIF in other journals**

Please refer to the *Notes for Authors* of the relevant journal for any special instructions relating to CIF submission.

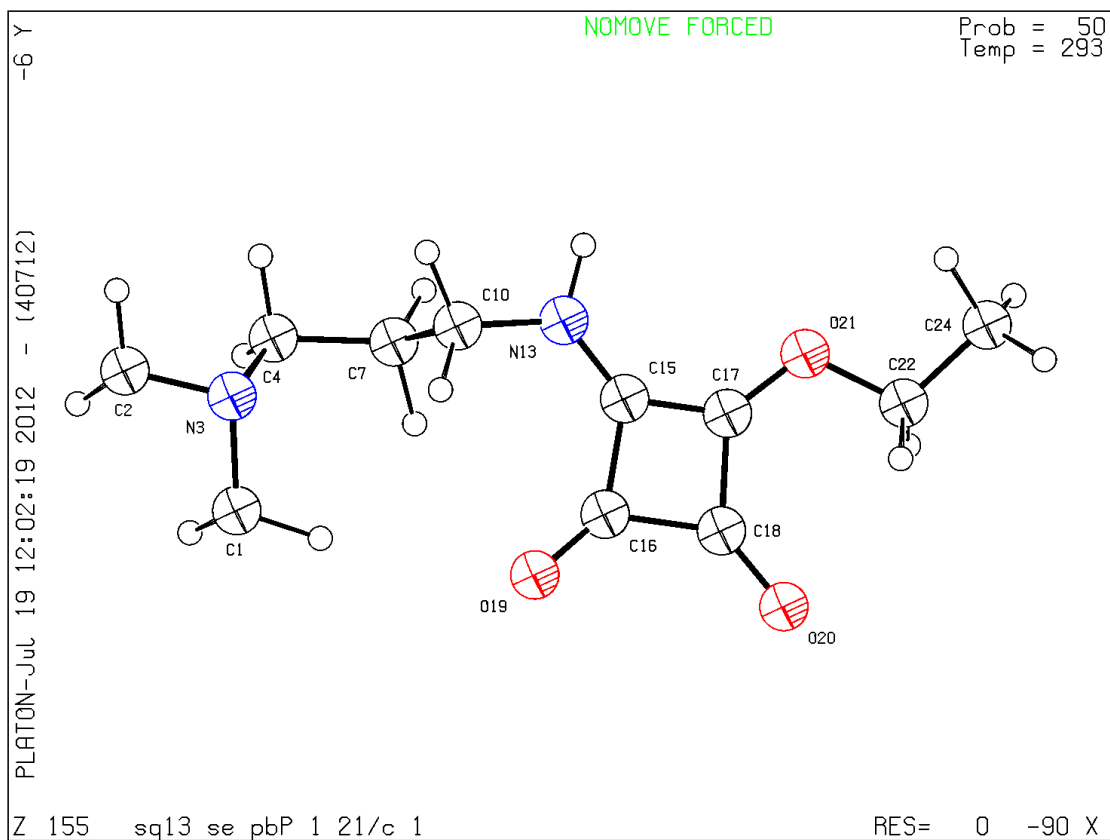

Supplement: Supplementary file 1 [file 4133398]
